# Supplementary material for: Substance use and symptoms of mental health disorders: a prospective cohort of patients with severe substance use disorders in Norway
Source: PubMed Central journal article supplement (PMC7912462; doi:10.1186/s13011-021-00354-1), 2021-02-27

# Distribution of Mean SCL-10 Item Scores

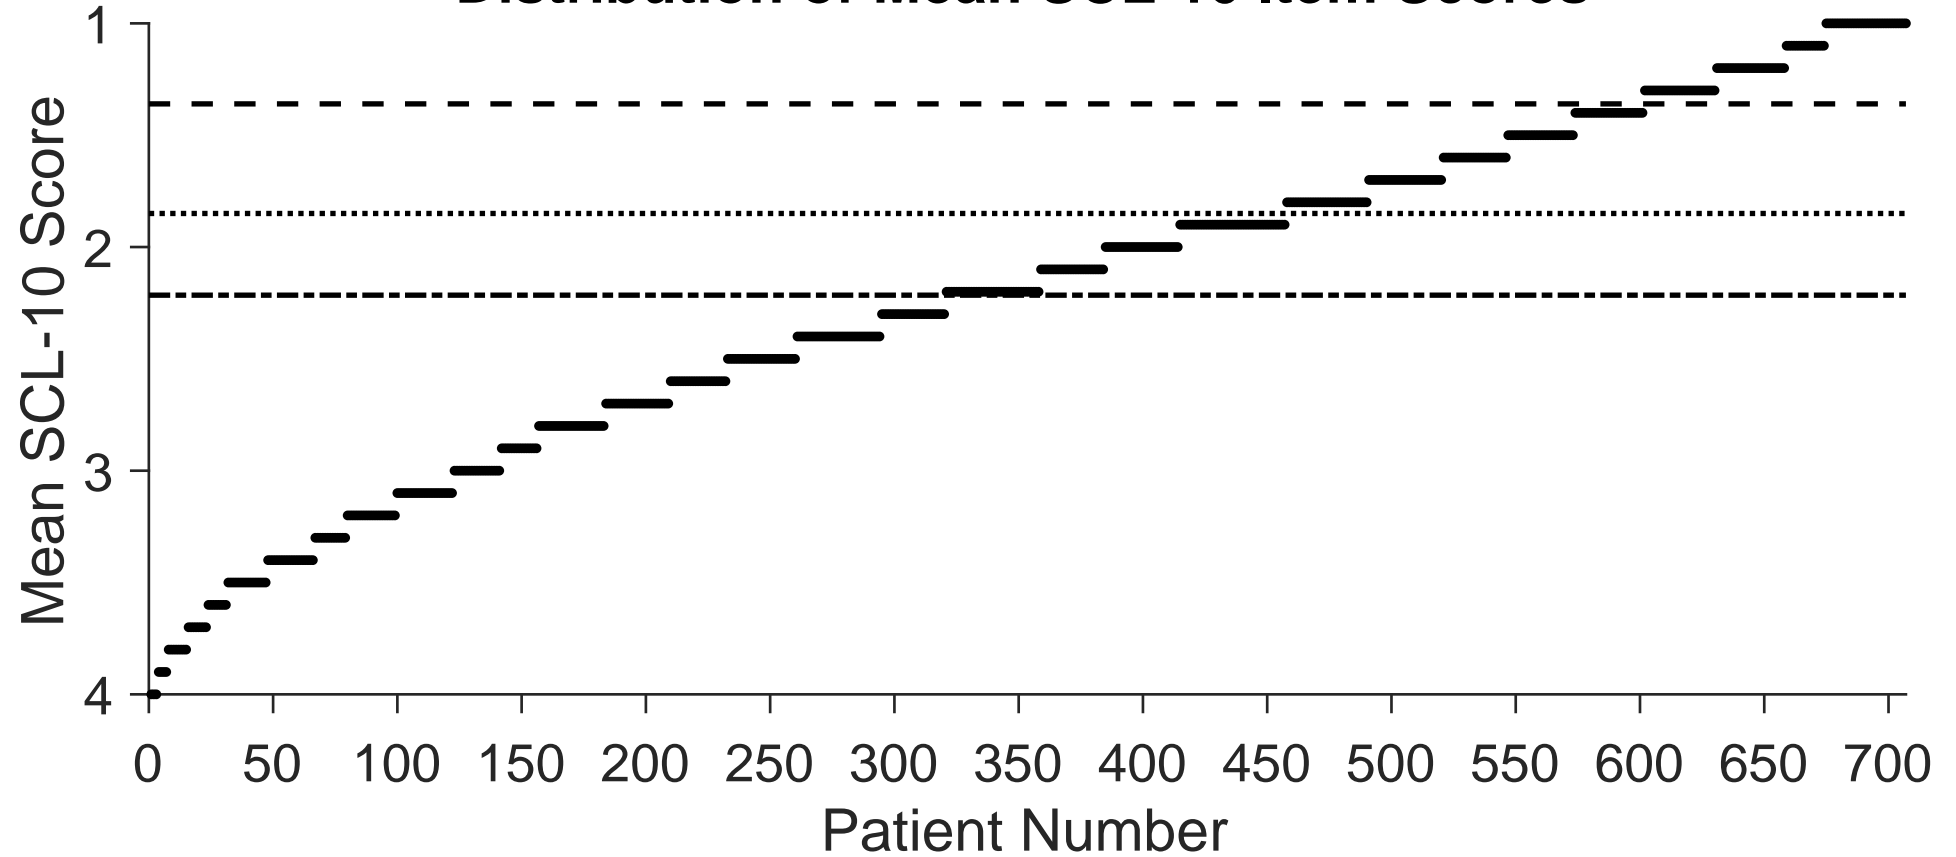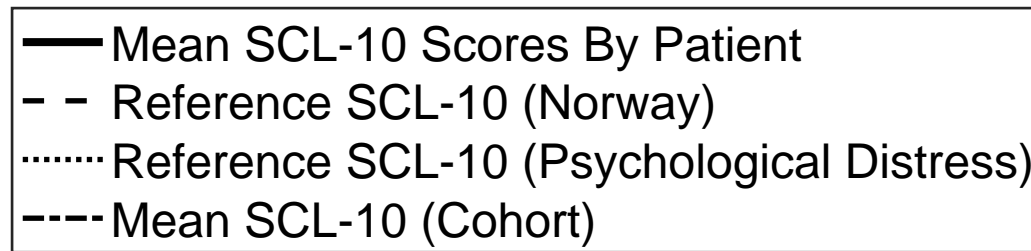

Supplement: 13011_2021_354_MOESM2_ESM.pdf [file 13011_2021_354_MOESM2_ESM.pdf]
